Il rassemble 25 communications qui ont été présentées par des administrateurs, des économistes, des scientifiques et des spécialistes de l'armement et de la pêche, tant européens que nord-américains, à un congrès qui eut lieu à Rouen en 1966. Il ne s'agit donc pas d'un travail de synthèse sur la géo-économie de la morue mais d'études particulières, qui ont été groupées en 5 sections pour couvrir l'essentiel du sujet, et qui apportent une contribution intéressante à l'analyse des problèmes que soulève l'exploitation des stocks de l'Atlantique nord.

Dans la première partie, à côté d'un travail très complet sur l'histoire de la pêche française à Terre Neuve depuis le début du 16<sup>ème</sup> siècle, ce sont des problèmes généraux tels que valeur alimentaire de la morue, technique navale et navigation, qui sont abordés.

Les autres parties traitent surtout de la pêche et de son évolution, des marchés et de la place qu'occupe ce poisson dans l'économie générale des pays producteurs mais de ce point de vue on peut regretter l'absence de données concernant les prises faites par quelques-uns parmi les plus importants d'entre-eux.

Deux articles traitent des problèmes de salage et de congélation et trois autres des travaux de recherches concernant la morue. L'un résume les activités de la France dans ce domaine depuis 1922, l'autre, par P. HANSEN, ce que l'on sait sur la biologie et l'écologie de la morue atlantique.

Le dernier, par J. C. QUART, apporte d'intéressantes données sur la pêche et le stock très particulier de la morue du Pacifique.

Si la part de la recherche n'a donc pas été négligée, elle ne constitue cependant pas l'essentiel d'un ouvrage surtout destiné à des géographes et des économistes, comme l'indique son titre, et où ils trouveront de très utiles informations sur une activité qu'ils ont parfois tendance à négliger faute de documents de valeur rassemblés à leur intention.

Il convient donc de féliciter le professeur MALAURIE de l'avoir fait et d'offrir aux lecteurs un ouvrage qui attire leur attention sur une pêche étroitement liée à l'histoire maritime des peuples de l'Europe de l'Ouest et qui constitue maintenant, pour eux et pour ceux du Nouveau Monde, une ressource commune dont il leur incombe d'assurer une gestion profitable à tous. C'est d'ailleurs cette idée qui se dégage du rapport de synthèse qui sert de conclusion à l'ouvrage. Si les chercheurs ont toujours eu conscience de la nécessité d'une étroite collaboration, et si les administrateurs ont cherché à la concrétiser dans le cadre de conventions internationales, il importe maintenant de dégager, sur ces bases et en accord avec les professionnels, les grandes lignes d'une politique internationale car l'industrialisation de la pêche n'offre pas d'autre voie.

*R. Letaconnoux*

Institut Scientifique et Technique des  
Pêches Maritimes  
La Noë  
Nantes, France

#### BOOKS RECEIVED

- TYLER, JOHN E. & SMITH, RAYMOND C. "*Measurements of Spectral Irradiance Underwater*". Gordon and Breach Ltd., London, 1970. Ocean Sciences Ser. No. 1, 103 pp., 51 illustrations. 195 s.
- DUING, WALTER. "*The Monsoon Regime of the Currents in the Indian Ocean*". East-west Centre Press, Honolulu, 1970. International Indian Ocean Expedition Monographs, No. 1, 68 pp., 37 illustrations. \$ 7.50.
- ANON. "*The Ocean, a Scientific American book*". W. H. Freeman and Co. Ltd., Folkestone, England 1970, 140 pp., 103 illus. 60 s. (cloth), 28 s. (paper).
